# Supplementary material for: Plasma clusterin as a candidate pre-diagnosis marker of colorectal cancer risk in the Florence cohort of the European Prospective Investigation into Cancer and Nutrition: a pilot study
Source: PubMed Central journal article supplement (PMC4334607; doi:10.1186/s12885-015-1058-7), 2015-02-14
Supplement: 12885_2015_1058_MOESM2_ESM.pdf [file 12885_2015_1058_MOESM2_ESM.pdf]

Table S1.

## Phase 1 Exploratory Study, List of proteins identified by LC-ESI-MS/MS after 1DE separation and their relative quantitation by spectral count

| Protein Name                       | UniProt Entry Name | SwissProt- UniProt No. | CRC case Pool          |   |    | Control Pool           |   |     | FC <sup>b</sup> | VIP value <sup>d</sup> |
|------------------------------------|--------------------|------------------------|------------------------|---|----|------------------------|---|-----|-----------------|------------------------|
|                                    |                    |                        | Spectral Counts        |   |    | Spectral Counts        |   |     |                 |                        |
|                                    |                    |                        | Mean ± SD <sup>a</sup> |   |    | Mean ± SD <sup>a</sup> |   |     |                 |                        |
| Actin, cytoplasmic 1               | ACTB_HUMAN         | P60709                 | 5                      | ± | 2  | 6                      | ± | 7   | -1.27           | 0.1668                 |
| Afamin                             | AFAM_HUMAN         | P43652                 | 23                     | ± | 1  | 30                     | ± | 7   | -1.30           | 0.7291                 |
| Alpha-1-acid glycoprotein          | A1AG1_HUMAN        | P02763                 | 6                      | ± | 1  | 3                      | ± | 0.4 | <b>1.85</b>     | 0.5556                 |
| Alpha-1-acid glycoprotein 2        | A1AG2_HUMAN        | P19652                 | 3                      | ± | 2  | 3                      | ± | 1   | -1.00           | 0.0011                 |
| Alpha-1-antichymotrypsin           | AACT_HUMAN         | P01011                 | 100                    | ± | 8  | 43                     | ± | 8   | <b>2.32</b>     | <b>2.5592</b>          |
| Alpha-1B-glycoprotein              | A1BG_HUMAN         | P04217                 | 20                     | ± | 5  | 20                     | ± | 7   | -1.04           | 0.0912                 |
| Alpha-2-antiplasmin                | A2AP_HUMAN         | P08697                 | 14                     | ± | 3  | 12                     | ± | 2   | 1.19            | 0.3603                 |
| Alpha-2-HS-glycoprotein            | FETUA_HUMAN        | P02765                 | 19                     | ± | 6  | 27                     | ± | 7   | -1.43           | 0.7309                 |
| Alpha-2-macroglobulin              | A2MG_HUMAN         | P01023                 | 527                    | ± | 46 | 689                    | ± | 73  | -1.31           | <b>4.0391</b>          |
| Angiotensinogen                    | ANGT_HUMAN         | P01019                 | 13                     | ± | 1  | 14                     | ± | 6   | -1.02           | 0.0353                 |
| Antithrombin-III                   | ANT3_HUMAN         | P01008                 | 57                     | ± | 10 | 62                     | ± | 14  | -1.07           | 0.3285                 |
| Apolipoprotein A-I                 | APOA1_HUMAN        | P02647                 | 195                    | ± | 32 | 226                    | ± | 26  | -1.16           | <b>1.4098</b>          |
| Apolipoprotein A-II                | APOA2_HUMAN        | P02652                 | 15                     | ± | 1  | 18                     | ± | 6   | -1.19           | 0.3571                 |
| Apolipoprotein A-IV                | APOA4_HUMAN        | P06727                 | 37                     | ± | 7  | 47                     | ± | 7   | -1.27           | 0.8728                 |
| Apolipoprotein B-100               | APOB_HUMAN         | P04114                 | 467                    | ± | 84 | 475                    | ± | 78  | -1.02           | 0.2437                 |
| Apolipoprotein D                   | APOD_HUMAN         | P05090                 | 26                     | ± | 9  | 25                     | ± | 6   | 1.03            | 0.0643                 |
| Apolipoprotein E                   | APOE_HUMAN         | P02649                 | 39                     | ± | 5  | 34                     | ± | 7   | 1.13            | 0.4459                 |
| Apolipoprotein L1                  | APOL1_HUMAN        | O14791                 | 10                     | ± | 1  | 10                     | ± | 2   | -1.05           | 0.1040                 |
| Apolipoprotein M                   | APOM_HUMAN         | O95445                 | 8                      | ± | 2  | 6                      | ± | 2   | 1.36            | 0.3465                 |
| Beta-2-glycoprotein 1              | APOH_HUMAN         | P02749                 | 30                     | ± | 7  | 26                     | ± | 4   | 1.15            | 0.4219                 |
| C-reactive protein                 | CRP_HUMAN          | P02741                 | 12                     | ± | 1  | 1                      | ± | 1   | <b>16.97</b>    | <b>1.1243</b>          |
| C4b-binding protein alpha chain    | C4BPA_HUMAN        | P04003                 | 53                     | ± | 6  | 35                     | ± | 3   | <b>1.51</b>     | <b>1.3888</b>          |
| Carbonic anhydrase 1               | CAH1_HUMAN         | P00915                 | 3                      | ± | 1  | 8                      | ± | 1   | <b>-2.48</b>    | 0.7014                 |
| Carboxypeptidase N catalytic chain | CBPN_HUMAN         | P15169                 | 6                      | ± | 1  | 6                      | ± | 4   | 1.10            | 0.0930                 |
| Carboxypeptidase N subunit 2       | CPN2_HUMAN         | P22792                 | 4                      | ± | 2  | 5                      | ± | 1   | -1.05           | 0.0412                 |
| CD5 antigen-like                   | CD5L_HUMAN         | O43866                 | 3                      | ± | 1  | 5                      | ± | 2   | <b>-1.72</b>    | 0.4023                 |
| Ceruloplasmin                      | CERU_HUMAN         | P00450                 | 123                    | ± | 21 | 106                    | ± | 20  | 1.16            | 0.9296                 |
| Clusterin                          | CLUS_HUMAN         | P10909                 | 31                     | ± | 3  | 33                     | ± | 4   | -1.07           | 0.2766                 |

continued Table S1.

page 2/4

| Protein Name                          | UniProt Entry Name | SwissProt- UniProt No. | CRC case Pool          |   |    | Control Pool           |   |     | FC <sup>b</sup> | VIP value <sup>d</sup> |
|---------------------------------------|--------------------|------------------------|------------------------|---|----|------------------------|---|-----|-----------------|------------------------|
|                                       |                    |                        | Spectral Counts        |   |    | Spectral Counts        |   |     |                 |                        |
|                                       |                    |                        | Mean ± SD <sup>a</sup> |   |    | Mean ± SD <sup>a</sup> |   |     |                 |                        |
| Coagulation factor X                  | FA10_HUMAN         | P00742                 | 3                      | ± | 2  | 4                      | ± | 4   | -1.12           | 0.0643                 |
| Coagulation factor XII                | FA12_HUMAN         | P00748                 | 4                      | ± | 1  | 3                      | ± | 1   | 1.11            | 0.1111                 |
| Complement C1q subcomponent subunit B | C1QB_HUMAN         | P02746                 | 10                     | ± | 4  | 9                      | ± | 2   | 1.07            | 0.1069                 |
| Complement C1q subcomponent subunit C | C1QC_HUMAN         | P02747                 | 14                     | ± | 4  | 9                      | ± | 1   | <b>1.57</b>     | 0.6476                 |
| Complement C1r subcomponent           | C1R_HUMAN          | P00736                 | 10                     | ± | 4  | 8                      | ± | 1   | 1.24            | 0.3002                 |
| Complement C1s subcomponent           | C1S_HUMAN          | P09871                 | 15                     | ± | 1  | 19                     | ± | 3   | -1.27           | 0.5884                 |
| Complement C2                         | CO2_HUMAN          | P06681                 | 14                     | ± | 5  | 12                     | ± | 4   | 1.17            | 0.2675                 |
| Complement C3                         | CO3_HUMAN          | P01024                 | 837                    | ± | 34 | 773                    | ± | 106 | 1.08            | <b>1.8297</b>          |
| Complement C4-B                       | CO4B_HUMAN         | P0C0L5                 | 218                    | ± | 8  | 185                    | ± | 35  | 1.18            | <b>1.5759</b>          |
| Complement C5                         | CO5_HUMAN          | P01031                 | 64                     | ± | 2  | 41                     | ± | 6   | <b>1.55</b>     | <b>1.6023</b>          |
| Complement component C6               | CO6_HUMAN          | P13671                 | 18                     | ± | 3  | 13                     | ± | 1   | 1.38            | 0.7032                 |
| Complement component C7               | CO7_HUMAN          | P10643                 | 11                     | ± | 2  | 12                     | ± | 5   | -1.18           | 0.2555                 |
| Complement component C8 alpha chain   | CO8A_HUMAN         | P07357                 | 5                      | ± | 1  | 4                      | ± | 1   | 1.21            | 0.2479                 |
| Complement component C8 beta chain    | CO8B_HUMAN         | P07358                 | 6                      | ± | 1  | 4                      | ± | 3   | 1.29            | 0.2081                 |
| Complement component C8 gamma chain   | CO8G_HUMAN         | P07360                 | 14                     | ± | 2  | 10                     | ± | 3   | 1.38            | 0.5522                 |
| Complement component C9               | CO9_HUMAN          | P02748                 | 18                     | ± | 5  | 11                     | ± | 5   | <b>1.60</b>     | 0.7036                 |
| Complement factor B                   | CFAB_HUMAN         | P00751                 | 80                     | ± | 12 | 55                     | ± | 6   | 1.44            | <b>1.5539</b>          |
| Complement factor H                   | CFAH_HUMAN         | P08603                 | 79                     | ± | 18 | 81                     | ± | 3   | -1.02           | 0.1057                 |
| Complement factor H-related protein 1 | FHR1_HUMAN         | Q03591                 | 13                     | ± | 2  | 11                     | ± | 4   | 1.11            | 0.1976                 |
| Complement factor I                   | CFAI_HUMAN         | P05156                 | 15                     | ± | 1  | 10                     | ± | 1   | 1.40            | 0.6639                 |
| Corticosteroid-binding globulin       | CBG_HUMAN          | P08185                 | 6                      | ± | 1  | 6                      | ± | 1   | 1.09            | 0.1445                 |
| Fibrinogen alpha chain                | FIBA_HUMAN         | P02671                 | 556                    | ± | 23 | 403                    | ± | 66  | 1.38            | <b>3.9906</b>          |
| Fibrinogen beta chain                 | FIBB_HUMAN         | P02675                 | 277                    | ± | 20 | 161                    | ± | 30  | <b>1.72</b>     | <b>3.5866</b>          |
| Fibrinogen gamma chain                | FIBG_HUMAN         | P02679                 | 213                    | ± | 29 | 152                    | ± | 25  | 1.40            | <b>2.4133</b>          |
| Fibronectin                           | FINC_HUMAN         | P02751                 | 118                    | ± | 8  | 110                    | ± | 13  | 1.07            | 0.5892                 |
| Fibulin-1                             | FBLN1_HUMAN        | P23142                 | 2                      | ± | 1  | 4                      | ± | 0.4 | <b>-2.33</b>    | 0.4732                 |
| Ficolin-3                             | FCN3_HUMAN         | O75636                 | 6                      | ± | 1  | 4                      | ± | 1   | <b>1.60</b>     | 0.4612                 |
| Galectin-3-binding protein            | LG3BP_HUMAN        | Q08380                 | 3                      | ± | 2  | 9                      | ± | 1   | <b>-3.18</b>    | 0.8048                 |
| Gelsolin                              | GELS_HUMAN         | P06396                 | 23                     | ± | 6  | 39                     | ± | 6   | <b>-1.67</b>    | <b>1.2344</b>          |

| continued Table S1.                                                    |                    |                        |                        |   |     |                        |   |     |                 | page 3/4               |  |
|------------------------------------------------------------------------|--------------------|------------------------|------------------------|---|-----|------------------------|---|-----|-----------------|------------------------|--|
| Protein Name                                                           | UniProt Entry Name | SwissProt- UniProt No. | CRC case Pool          |   |     | Control Pool           |   |     | FC <sup>b</sup> | VIP value <sup>d</sup> |  |
|                                                                        |                    |                        | Spectral Counts        |   |     | Spectral Counts        |   |     |                 |                        |  |
|                                                                        |                    |                        | Mean ± SD <sup>a</sup> |   |     | Mean ± SD <sup>a</sup> |   |     |                 |                        |  |
| Glutathione peroxidase 3                                               | GPX3_HUMAN         | P22352                 | 4                      | ± | 0.2 | 3                      | ± | 0.3 | 1.37            | 0.3465                 |  |
| Hemopexin                                                              | HEMO_HUMAN         | P02790                 | 60                     | ± | 15  | 65                     | ± | 15  | -1.09           | 0.3678                 |  |
| Heparin cofactor 2                                                     | HEP2_HUMAN         | P05546                 | 18                     | ± | 3   | 15                     | ± | 4   | 1.17            | 0.3433                 |  |
| Histidine-rich glycoprotein                                            | HRG_HUMAN          | P04196                 | 18                     | ± | 1   | 19                     | ± | 1   | -1.06           | 0.2602                 |  |
| Ig kappa chain C region                                                | IGKC_HUMAN         | P01834                 | 10                     | ± | 1   | 8                      | ± | 3   | 1.21            | 0.2959                 |  |
| Ig lambda-2 chain C regions                                            | LAC2_HUMAN         | P0CG05                 | 13                     | ± | 2   | 12                     | ± | 3   | 1.05            | 0.0953                 |  |
| Ig mu chain C region                                                   | IGHM_HUMAN         | P01871                 | 20                     | ± | 0   | 22                     | ± | 1   | -1.10           | 0.4196                 |  |
| Insulin-like growth factor-binding protein complex acid labile subunit | ALS_HUMAN          | P35858                 | 6                      | ± | 3   | 7                      | ± | 2   | -1.07           | 0.0715                 |  |
| Inter-alpha-trypsin inhibitor heavy chain H1                           | ITIH1_HUMAN        | P19827                 | 67                     | ± | 6   | 55                     | ± | 7   | 1.21            | <b>0.9998</b>          |  |
| Inter-alpha-trypsin inhibitor heavy chain H2                           | ITIH2_HUMAN        | P19823                 | 145                    | ± | 9   | 124                    | ± | 28  | 1.17            | <b>1.1418</b>          |  |
| Inter-alpha-trypsin inhibitor heavy chain H3                           | ITIH3_HUMAN        | Q06033                 | 11                     | ± | 0   | 4                      | ± | 1   | <b>2.61</b>     | 0.8991                 |  |
| Inter-alpha-trypsin inhibitor heavy chain H4                           | ITIH4_HUMAN        | Q14624                 | 62                     | ± | 5   | 63                     | ± | 6   | -1.02           | 0.1463                 |  |
| Kallistatin                                                            | KAIN_HUMAN         | P29622                 | 1                      | ± | 1   | 7                      | ± | 3   | <b>-5.44</b>    | 0.7907                 |  |
| Kininogen-1                                                            | KNG1_HUMAN         | P01042                 | 31                     | ± | 1   | 34                     | ± | 9   | -1.09           | 0.3042                 |  |
| Leucine-rich alpha-2-glycoprotein                                      | A2GL_HUMAN         | P02750                 | 15                     | ± | 6   | 7                      | ± | 3   | <b>1.99</b>     | 0.7601                 |  |
| Mannose-binding protein C                                              | MBL2_HUMAN         | P11226                 | 4                      | ± | 1   | 2                      | ± | 1   | <b>1.81</b>     | 0.3600                 |  |
| N-acetylmuramoyl-L-alanine amidase                                     | PGRP2_HUMAN        | Q96PD5                 | 4                      | ± | 0.5 | 5                      | ± | 3   | -1.28           | 0.1984                 |  |
| Peroxiredoxin-2                                                        | PRDX2_HUMAN        | P32119                 | 3                      | ± | 1   | 5                      | ± | 1   | <b>-1.83</b>    | 0.4945                 |  |
| Pigment epithelium-derived factor                                      | PEDF_HUMAN         | P36955                 | 14                     | ± | 4   | 16                     | ± | 5   | -1.18           | 0.3007                 |  |
| Plasma kallikrein                                                      | KLKB1_HUMAN        | P03952                 | 18                     | ± | 2   | 22                     | ± | 5   | -1.20           | 0.4766                 |  |
| Plasma protease C1 inhibitor                                           | IC1_HUMAN          | P05155                 | 36                     | ± | 8   | 36                     | ± | 4   | 1.02            | 0.0688                 |  |
| Plasminogen                                                            | PLMN_HUMAN         | P00747                 | 39                     | ± | 6   | 34                     | ± | 5   | 1.14            | 0.5118                 |  |
| Protein AMBP                                                           | AMBP_HUMAN         | P02760                 | 25                     | ± | 3   | 22                     | ± | 3   | 1.13            | 0.4061                 |  |
| Prothrombin                                                            | THRB_HUMAN         | P00734                 | 35                     | ± | 9   | 31                     | ± | 9   | 1.12            | 0.3236                 |  |
| Retinol-binding protein 4                                              | RET4_HUMAN         | P02753                 | 26                     | ± | 6   | 27                     | ± | 5   | -1.04           | 0.1281                 |  |
| Serum amyloid A protein                                                | SAA_HUMAN          | PODJ18                 | 8                      | ± | 0.3 | nd <sup>c</sup>        |   |     | nd <sup>c</sup> | 0.9784                 |  |
| Serum amyloid A-4 protein                                              | SAA4_HUMAN         | P35542                 | 18                     | ± | 1   | 14                     | ± | 2   | 1.30            | 0.6385                 |  |
| Serum amyloid P-component                                              | SAMP_HUMAN         | P02743                 | 17                     | ± | 1   | 15                     | ± | 6   | 1.16            | 0.2992                 |  |

continued Table S1. page4/4    page 4/4

| Protein Name                     | UniProt Entry Name | SwissProt- UniProt No. | CRC case Pool   |   |                 | Control Pool    |   |                 | FC <sup>b</sup> | VIP value <sup>d</sup> |
|----------------------------------|--------------------|------------------------|-----------------|---|-----------------|-----------------|---|-----------------|-----------------|------------------------|
|                                  |                    |                        | Spectral Counts |   |                 | Spectral Counts |   |                 |                 |                        |
|                                  |                    |                        | Mean            | ± | SD <sup>a</sup> | Mean            | ± | SD <sup>a</sup> |                 |                        |
| Serum paraoxonase/arylesterase 1 | PON1_HUMAN         | P27169                 | 18              | ± | 4               | 22              | ± | 3               | -1.22           | 0.5052                 |
| Sex hormone-binding globulin     | SHBG_HUMAN         | P04278                 | 2               | ± | 1               | 3               | ± | 2               | <b>-1.69</b>    | 0.2730                 |
| Tetranectin                      | TETN_HUMAN         | P05452                 | 5               | ± | 3               | 6               | ± | 2               | -1.11           | 0.0960                 |
| Thyroxine-binding globulin       | THBG_HUMAN         | P05543                 | 6               | ± | 2               | 7               | ± | 1               | -1.00           | 0.0026                 |
| Transthyretin                    | TTHY_HUMAN         | P02766                 | 50              | ± | 7               | 57              | ± | 8               | -1.13           | 0.6127                 |
| Vitamin D-binding protein        | VTDB_HUMAN         | P02774                 | 51              | ± | 4               | 57              | ± | 9               | -1.12           | 0.6018                 |
| Vitamin K-dependent protein S    | PROS_HUMAN         | P07225                 | 6               | ± | 1               | 4               | ± | 1               | <b>1.76</b>     | 0.5437                 |
| Vitronectin                      | VTNC_HUMAN         | P04004                 | 20              | ± | 4               | 17              | ± | 1               | 1.17            | 0.4184                 |
| Zinc-alpha-2-glycoprotein        | ZA2G_HUMAN         | P25311                 | 9               | ± | 2               | 10              | ± | 1               | -1.08           | 0.1432                 |

<sup>a</sup> Mean ± SD of three technical replicates

<sup>b</sup> FC, Fold Change, Spectral counts of CRC cases/controls; **bold**, FC≥1.5; **bold-italic**, FC≤-1.5

<sup>c</sup> nd, not detectable

<sup>d</sup> VIP, Variable Importance in the Projection (PLS-DA analysis); **bold**, VIP>1











| continued Table S2.                                                                                                                                                                                                                                                               |                    |                        |                                        |   |   |                                        |   |   |                 | page 5/5               |
|-----------------------------------------------------------------------------------------------------------------------------------------------------------------------------------------------------------------------------------------------------------------------------------|--------------------|------------------------|----------------------------------------|---|---|----------------------------------------|---|---|-----------------|------------------------|
| Protein Name                                                                                                                                                                                                                                                                      | UniProt Entry Name | SwissProt- UniProt No. | EPIC-CRC case Pool                     |   |   | EPIC-Control Pool                      |   |   | FC <sup>b</sup> | VIP value <sup>c</sup> |
|                                                                                                                                                                                                                                                                                   |                    |                        | Spectral Counts Mean ± SD <sup>a</sup> |   |   | Spectral Counts Mean ± SD <sup>a</sup> |   |   |                 |                        |
| Vitamin K-dependent protein S                                                                                                                                                                                                                                                     | PROS_HUMAN         | P07225                 | 13                                     | ± | 2 | 10                                     | ± | 2 | 1.31            | 0.6861                 |
| Vitronectin                                                                                                                                                                                                                                                                       | VTNC_HUMAN         | P04004                 | 43                                     | ± | 7 | 42                                     | ± | 7 | 1.03            | 0.1847                 |
| Zinc-alpha-2-glycoprotein                                                                                                                                                                                                                                                         | ZA2G_HUMAN         | P25311                 | 25                                     | ± | 5 | 28                                     | ± | 2 | -1.12           | 0.5624                 |
| <sup>a</sup> Mean ± SD of three technical replicates<br><sup>b</sup> FC, Fold Change, Spectral counts of CRC cases/controls; <b>bold</b> , FC≥1.5; <b>bold-italic</b> , FC<-1.5<br><sup>c</sup> VIP, Variable Importance in the Projection (PLS-DA analysis); <b>bold</b> , VIP>1 |                    |                        |                                        |   |   |                                        |   |   |                 |                        |

Table S3.

Relative amounts of proteins analysed by targeted proteomics (LC-SRM-MS) in the EPIC population not including Phase 2 samples (the number of subjects is given in parenthesis)

| Candidate Biomarker | Relative amount <sup>a</sup><br>Mean ± SD |              | P-value <sup>b</sup> | Relative amount <sup>a</sup><br>Mean + SD |                  | P-value <sup>b</sup> | Relative amount <sup>a</sup><br>Mean + SD |                | P-value <sup>b</sup> |
|---------------------|-------------------------------------------|--------------|----------------------|-------------------------------------------|------------------|----------------------|-------------------------------------------|----------------|----------------------|
|                     | Controls                                  | CRC Cases    |                      | Female Controls                           | Female CRC Cases |                      | Male Controls                             | Male CRC Cases |                      |
|                     | (38)                                      | (38)         |                      | (22)                                      | (22)             |                      | (16)                                      | (16)           |                      |
| APOC2               | 8.13 ± 3.16                               | 10.1 ± 7.27  | 0.26                 | 8.14 ± 2.68                               | 7.55 ± 3.47      | 0.50                 | 8.07 ± 3.47                               | 12.48 ± 10.3   | 0.1                  |
| CLU                 | 7.07 ± 1.85                               | 7.57 ± 1.87  | 0.22                 | 7.57 ± 1.59                               | 7.28 ± 2.33      | 0.97                 | 6.29 ± 1.91                               | 7.81 ± 1.83    | 0.019                |
| CO4-B               | 10.85 ± 6.08                              | 11.89 ± 6.18 | 0.38                 | 10.1 ± 4.47                               | 10.52 ± 6.81     | 1                    | 10.83 ± 8.07                              | 11.56 ± 5.0    | 0.38                 |
| CO9                 | 0.80 ± 0.34                               | 0.91 ± 0.36  | 0.22                 | 0.85 ± 0.3                                | 0.87 ± 0.38      | 0.87                 | 0.74 ± 0.38                               | 0.86 ± 0.33    | 0.4                  |
| FETUA               | 2.6 ± 1.03                                | 2.8 ± 0.89   | 0.26                 | 2.72 ± 0.97                               | 2.74 ± 1.04      | 0.76                 | 2.79 ± 1.12                               | 2.78 ± 0.9     | 0.89                 |
| MASP2               | 7.38 ± 2.35                               | 7.69 ± 2.57  | 0.7                  | 7.16 ± 1.93                               | 6.99 ± 2.27      | 0.84                 | 7.36 ± 2.59                               | 7.91 ± 2.86    | 0.51                 |
| MBL2                | 1.13 ± 0.58                               | 1.19 ± 0.52  | 0.56                 | 1.2 ± 0.62                                | 1.19 ± 0.57      | 0.97                 | 1.07 ± 0.57                               | 1.22 ± 0.54    | 0.53                 |
| PGRP2               | 0.54 ± 0.27                               | 0.54 ± 0.16  | 0.38                 | 0.59 ± 0.31                               | 0.48 ± 0.18      | 0.22                 | 0.48 ± 0.16                               | 0.56 ± 0.14    | 0.088                |

<sup>a</sup> Analyte peak area/internal standard peak area<sup>b</sup> Mann-Whitney U, two tailed

Table S4.

ROC analysis: AUC of various combinations of protein biomarkers in males <sup>a</sup>

| <b>Biomarker combination</b> | <b>AUC</b> | <b>95% CI</b> | <b>P-value</b> | <b>Sensitivity %</b> | <b>1-Specificity %</b> |
|------------------------------|------------|---------------|----------------|----------------------|------------------------|
| CLU + APOC2 + CO4-B          | 0.618      | 0.517 - 0.718 | 0.026          | 90                   | 68                     |
| CLU + APOC2 + MASP2          | 0.622      | 0.521 - 0.723 | 0.021          | 88                   | 68                     |

<sup>a</sup> Only the combinations with P-value <0.05 are shown
